# Supplementary material
Source: Research Square preprint supplement (doi:10.21203/rs.3.rs-9205409/v1)
Supplement: Supplementary file 1 [file 133bdb597b12ee4cd5747bc8.docx]

**Supplementary Information**

**Appendix I. Interview Guide**

**Section A: Background Information**

1. How old are you?
2. Can you briefly tell me about your current year in the nursing program?
3. What year specifically are you in?
4. What are some key courses or areas of study you are focusing on this year?
5. How many clinical placements have you completed so far?

**Section B: Clinical Practicum Experience**

1. Can you describe your overall experience in the clinical practicum?
2. When you think about your clinical practicum as a whole, what are the first things that come to mind?
3. Would you describe it as mostly positive, negative or both? Can you explain further?
4. What aspects of your clinical practicum have been most meaningful or impactful to you?
5. Is there an instance that comes in mind?
6. What did you learn from that experience?
7. How did your interactions with clinical instructors or preceptors influence your learning?
8. In what ways did they support your learning or skill development?
9. What qualities did you appreciate most in your instructors or preceptors?

**Section C: Challenges faced by students during clinical practicum**

1. Were there any specific challenges you encountered during your placement?
2. Could you give me an example of a challenging situation you faced?
3. How did you try to overcome that challenge?
4. Did you receive any form of support when facing this challenge? If yes, what form of support did you receive?

**Section D: Readiness for Practice**

1. How confident do you feel about entering professional practice after your clinical experience?
2. On a scale of 1 to 10 (1 being not confident at all and 10 extremely confident), where would you rate your current confidence level? Why?
3. What contributes to that feeling of confidence?
4. In what ways do you feel prepared for real-world nursing work?
5. What practical skill do you feel competent in?
6. How do you think your clinical experience has prepared you for the emotional and psychological demands of nursing?
7. Are there areas where you still feel uncertain or unprepared?
8. Could you describe some areas of uncertainty?
9. What makes you feel unprepared in those areas?
10. What kind of additional training do you think would help you feel more prepared in those areas?

**Section E: Reflections and suggestions**

1. How did your practicum shape your expectations about working as a nurse?
2. Before your practicum, what did you expect nursing practice would be like?
3. How have those expectations changed or been reinforced
4. Did anything surprise you about the reality of nursing work during your practicum?
5. If you could change anything about your clinical experience, what would it be?
6. What specific aspects or components would you modify?
7. Are there any particular resources or opportunities you wish you had access to?
8. What support or resources would have helped you feel more ready for practice?
9. Can you be specific about the type of support (e.g., more mentorship, better access to equipment)?
10. What advice would you give to nursing students starting their clinical practicum?
11. What are the most important things they should know or do to maximize their learning?
12. What pitfalls or challenges should they be prepared for?

Thank you.
